# Supplementary material
Source: ML conference proceedings conference paper supplement (https://proceedings.neurips.cc/paper_files/paper/2023/hash/412732f172bdd5ad0efde2fafa110700-Abstract.html)
Supplement: Supplementary file 1 [file 412732f172bdd5ad0efde2fafa110700-Supplemental-Datasets_and_Benchmarks.pdf]

## 1 Data Ingestion

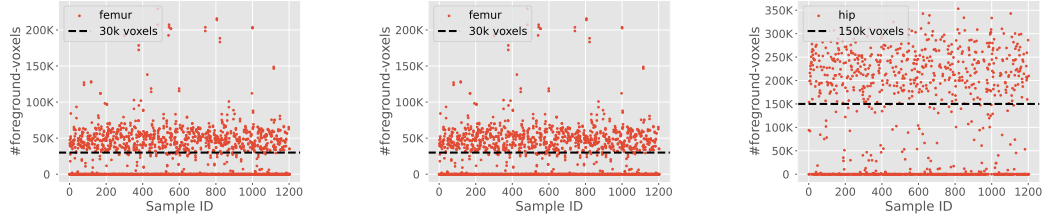

Figure 1: TotalSegmentator Dataset Ingestion: Selection of Samples was based on whether it contained a reasonable number of voxels (threshold defined individually for each anatomy) and then visually rejecting the remaining samples that contained only partial bones. Ribs were selected based on whether a full set of ribs were present.

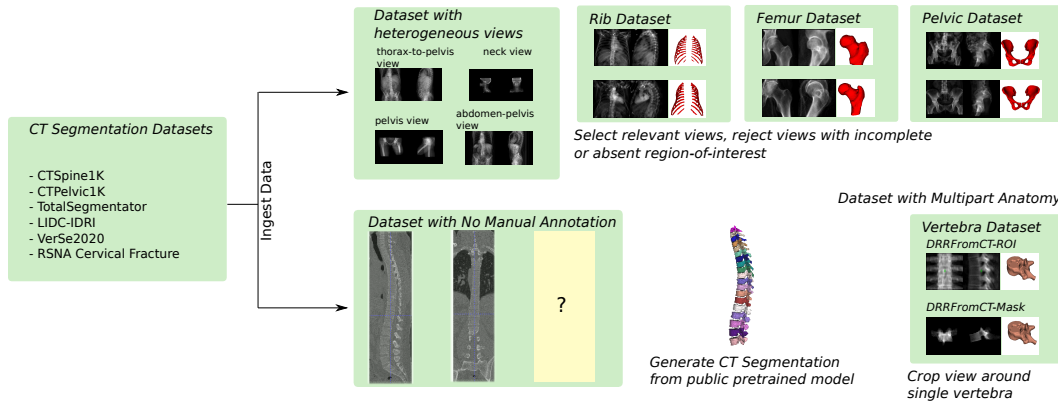

Figure 2: Data Ingestion: Various data preprocessing scenarios for Ingesting CT Segmentation Datasets for Biplanar X-ray to 3D Bone Shape Dataset

## 2 Benchmarking Tasks

Table 1: Benchmarking Tasks

| Benchmarking Evaluation Task                          | Training Dataset      | Testing Dataset         |
|-------------------------------------------------------|-----------------------|-------------------------|
| Architecture Comparison                               |                       |                         |
| Femur                                                 | TotalSeg-Femur        | TotalSeg-Femur          |
| Hip                                                   | TotalSeg-Pelvic       | TotalSeg-Pelvic         |
| Vertebra                                              | VerSe2019             | VerSe2019               |
| Rib                                                   | TotalSeg-Ribs         | TotalSeg-Ribs           |
| Domain Shift: Fractured Bone                          | TotalSeg-Pelvic       | CTPelvic1k-CLINIC       |
|                                                       | VerSe2019             | RSNA Cervical Fracture  |
| Domain Shift: X-ray with Bone Implants                | TotalSeg-Pelvic       | CTPelvic1k-CLINIC-Metal |
| Domain Shift: Cohort Shift (Population, Scanner etc.) | TotalSeg-Pelvic       | CTPelvic1k-KITS19       |
| Domain Shift: X-ray misalignment                      | TotalSeg-*, VerSe2019 | TotalSeg-*, VerSe2019   |

## 3 Hyperparameter Tuning

We split the dataset into train-val-tests by first splitting the whole dataset into the train-test split in the 85:15 ratio and then again splitting the train-split into the train-val split in the 85:15 ratio. We considered model selection for each of the models using the Dice Score metric on the train-val split. We used this validation performance to select the best hyperparameter setting and estimate the model training epochs. We then retrain the model using both train- and val-split as training data for

a fixed number of epochs determined during model selection and report metrics on test-split using the last epoch checkpoint. We choose the last epoch checkpoint since choosing the epoch with the best test-split metric would result in test-split leakage. We use default model sizes for off-the-shelf architectures such as AttentionUNet, UNETR and Unet.

| Method      | Task  | Encoder Channels                                 | Kernel Size | lr                  |
|-------------|-------|--------------------------------------------------|-------------|---------------------|
| TLPredictor | femur | 8,16,32<br><b>8,16,32,64</b><br>16,32,64,128,256 | 3,5         | <b>2e-3</b><br>2e-4 |

  

| Method      | Task | Encoder Channels                                                         | Decoder Channels                                                         | latent dim | kernel size | lr                  |
|-------------|------|--------------------------------------------------------------------------|--------------------------------------------------------------------------|------------|-------------|---------------------|
| AutoEncoder | rib  | 4,8,16,32<br><b>8,16,32,64</b><br>8,16,32,64,128<br>16,32,64,128,256,128 | 4,8,16,32<br><b>8,16,32,64</b><br>8,16,32,64,128<br>16,32,64,128,256,128 | 64         | 3           | <b>2e-3</b><br>2e-4 |

  

| Method             | Task  | Encoder Channels                                                                          | Decoder Channels                                                                          | fusion channels,depth                       | kernel size | lr           |
|--------------------|-------|-------------------------------------------------------------------------------------------|-------------------------------------------------------------------------------------------|---------------------------------------------|-------------|--------------|
| MultiScale2DConcat | femur | 4,8,16<br>8,16,32<br>4,8,16,32<br>8,16,32,64<br>8,16,32,64,128<br><b>4,8,16,32,64,128</b> | 4,8,16<br>8,16,32<br>4,8,16,32<br>8,16,32,64<br>8,16,32,64,128<br><b>4,8,16,32,64,128</b> | 32,2<br>32,3<br>32,4<br>32,5<br><b>32,6</b> | 3           | 1e-2<br>2e-3 |

  

| Method   | Task  | Encoder Channels                          | Decoder channels                                                                        | latent dim        | kernel size | lr   |
|----------|-------|-------------------------------------------|-----------------------------------------------------------------------------------------|-------------------|-------------|------|
| 1DConcat | femur | <b>32,64,128,256</b><br>32,64,128,256,512 | 128,1024,512,8,4,4,4<br>128,1024,512,256,128,64,32<br><b>256,1024,512,256,128,64,32</b> | 128<br><b>256</b> | 3,5         | 2e-2 |

  

| Method    | Task     | Feature Size   | num heads            | dropout rate | lr   |
|-----------|----------|----------------|----------------------|--------------|------|
| SwinUNETR | vertebra | 12<br>24<br>48 | 2,2,2,2<br>3,6,12,24 | 0.1          | 2e-3 |

  

| Method             | Task | Encoder Channels  | Decoder channels | kernel size | lr   |
|--------------------|------|-------------------|------------------|-------------|------|
| AttentionUnet/Unet |      | 8,16, 32, 64, 128 | 128,64,32,16,8   | 3           | 2e-2 |

Table 2: Model Architecture and Hyperparameter tuning configurations

12

## 13 4 Replicating reimplemented architectures

14 We performed an as-close-as-possible replication of Bayat et al and obtained comparable results  
 15 (95.31% DSC in the original work vs. 94.43% in our replication), which is reasonable given that  
 16 there is one important step without relevant information in the original paper that precludes exact  
 17 replication. The training set in the original work was not the full set of images in the dataset, but an  
 18 unknown subset. This is because the ground truth for the 3D reconstruction task in their case was a  
 19 silver standard mask predicted by a deep learning segmentation model, and a radiologist manually  
 20 went through the masks and removed 50 data points whose masks were deemed implausible. Original  
 21 work reported results on the manually cleaned silver-standard dataset, but the information regarding  
 22 the exact scans from the LIDC dataset that were discarded has not been made public.

23 For all other remaining architectures, the reported results are from private datasets. Some of our  
 24 key motivations for this work are because of these challenges. Lack of reproducibility and disparate  
 25 dataset quality makes it difficult for new methods to be compared with existing ones, which could  
 26 potentially continue for newer methods in future if a common setting is not made available.

## 27 5 Benchmark Framework Usage

### 28 Configuration File

```
1 ---
2
3 # subject-list
4 subjects:
5   subject_basepath: 2D-3D-Reconstruction-Datasets/lidc/subjectwise
6   subject_list: configs/subjects_list/lidc_subject_list.lst
7
8 # xray image properties
9 xray_pose:
10   _load: xray_pose_conf/${ROI_properties.axcode}_pose.yaml
11   res: ${ROI_properties.res}
12   size: ${ROI_properties.size}
13   drr_from_ct_mask: ${ROI_properties.drr_from_ct_mask}
14   drr_from_mask: ${ROI_properties.drr_from_mask}
15
16 # output directories
17 out_directories:
18   _load: directory_conf/dir_ct.yaml
19
20 # ROI extraction properties
21 ROI_properties:
22   axcode: PIR
23   extraction_ratio:
24     L: 0.5
25     A: 0.5
26     S: 0.5
27   ct_padding: -1024
28   seg_padding: 0
29   drr_from_ct_mask: False
30   drr_from_mask: False
31   res: 1.0
32   size: 96
33
34 # filename conventions
35 filename_convention:
36   input:
37     ct: "ct.nii.gz"
38     seg: "seg.nii.gz"
39   output:
40     vert_xray_ap: "{id}_vert-{vert}_ap.png"
41     vert_xray_lat: "{id}_vert-{vert}_lat.png"
42     vert_centroid: "{id}_vert-{vert}_centroid.nii.gz"
43     vert_centroid_xray_ap: "{id}_vert-{vert}_ap_centroid.png"
44     vert_centroid_xray_lat: "{id}_vert-{vert}_lat_centroid.png"
45     vert_ct: '{id}_vert-{vert}_ct.nii.gz' # add 'vert' for vertebra
46     vert_seg: '{id}_vert-{vert}-seg-vert_msk.nii.gz'
47     vert_overlay_ap: "{id}_vert-{vert}_ap_overlay.png"
48     vert_overlay_lat: "{id}_vert-{vert}_lat_overlay.png"
49
```

## 29 6 Clinical Metrics

### 30 6.1 Vertebra Morphometry

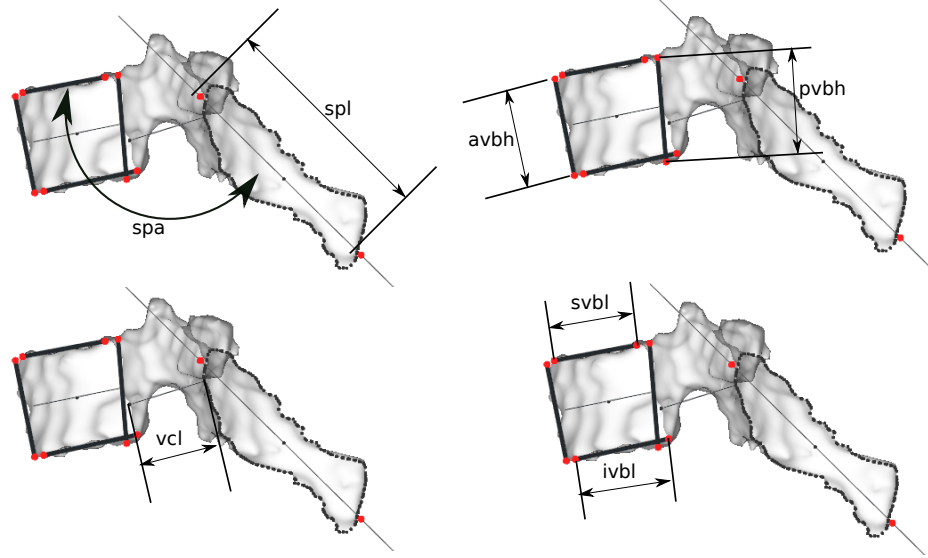

Figure 3: Vertebra Morphometry Metrics

31 **Femur Morphometry** We automatically extract Femoral Head Radius(FHR) and Neck Shaft Angle (NSA) from Femur Segmentation by adapting [? ]. The following adaptations were made: i) Since  
 32 full-length femur bones were not available, automatic estimation of the diaphysis axis as described in  
 33 [? ] was not possible. Hence, manual localization of the subtrochanteric region was performed on  
 34 groundtruth segmentation and then transferred to predicted segmentation. This localization allows  
 35 robust circle fitting to estimate the diaphysis axis. ii) Some of the samples do not even contain  
 36 enough subtrochanteric region to reliably estimate the femur diaphysis axis. For these examples,  
 37 Neck Shaft Angle(NSA) cannot be estimated. Additionally, [? ] requires estimation of the diaphysis  
 38 axis for robust localization of the femoral head and neck region. As an alternative, for such cases, we  
 39 transfer femoral head and neck localization from the groundtruth. The manual localization of the  
 40 subtrochanteric region is provided in the Benchmarking Framework Repository.  
 41

42 We find that the variability due to these modifications is similar to the original method except for  
 43 slightly increased variability in estimating (Femur Diaphysis Axis) FDA as shown in fig 4. We think  
 44 that this ambiguity is due to not having enough subtrochanteric and diaphysis regions to accurately  
 estimate FDA.

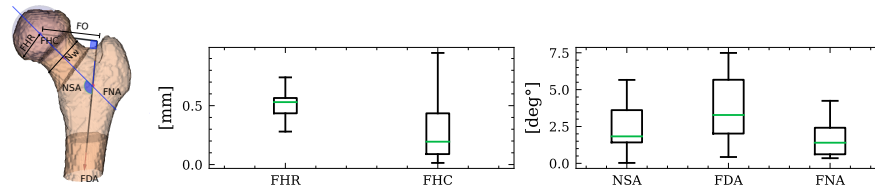

Figure 4: Repeatability of the femur morphometry extraction method as measured by error distributions for a) the landmarks/anatomical sizes and b) axis alignment identified by the adapted method.

| Method             | In-domain<br>[TOTALSEG] | OOD<br>[KITS19] | $\Delta$ | OOD<br>[CLINIC] | $\Delta$ | OOD<br>[CLINIC-METAL] | $\Delta$ | In-domain<br>[Verse19] | OOD<br>[RSNA] | $\Delta$ |
|--------------------|-------------------------|-----------------|----------|-----------------|----------|-----------------------|----------|------------------------|---------------|----------|
| SwinUNETR          | 85.78                   | 77.68           | 8.09     | 76.04           | 9.74     | 74.71                 | 11.06    | 83.59                  | 73.42         | 10.18    |
| AttentionUnet      | 85.03                   | 78.64           | 6.39     | 75.22           | 9.81     | 72.14                 | 12.89    | 83.66                  | 73.23         | 10.43    |
| 2DConcat           | 84.75                   | 79.52           | 5.22     | 75.50           | 9.25     | 69.93                 | 14.82    | 83.62                  | 72.77         | 10.85    |
| UNet               | 84.45                   | 77.93           | 6.52     | 73.96           | 10.49    | 72.64                 | 11.80    | 82.17                  | 69.80         | 12.37    |
| MultiScale2DConcat | 84.48                   | 73.48           | 11.00    | 73.83           | 10.65    | 68.79                 | 15.69    | 81.85                  | 70.83         | 11.03    |
| UNETR              | 82.27                   | 75.82           | 6.45     | 72.41           | 9.86     | 69.79                 | 12.48    | 81.84                  | 71.39         | 10.45    |
| TLPredictor        | 79.33                   | 61.00           | 18.33    | 66.92           | 12.41    | 67.07                 | 12.26    | 79.20                  | 65.74         | 13.46    |
| OneDConcat         | 78.85                   | 60.39           | 18.46    | 65.52           | 13.33    | 67.36                 | 11.49    | 80.92                  | 69.35         | 11.57    |

Table 3: Reduction in Performance due to Domain Shift: The reduction in DSC (represented by column  $\Delta$ ) when comparing In-Domain performance with Out-of-Domain(OOD) performance shows the need for robustness against relevant shifts for clinical acceptance.

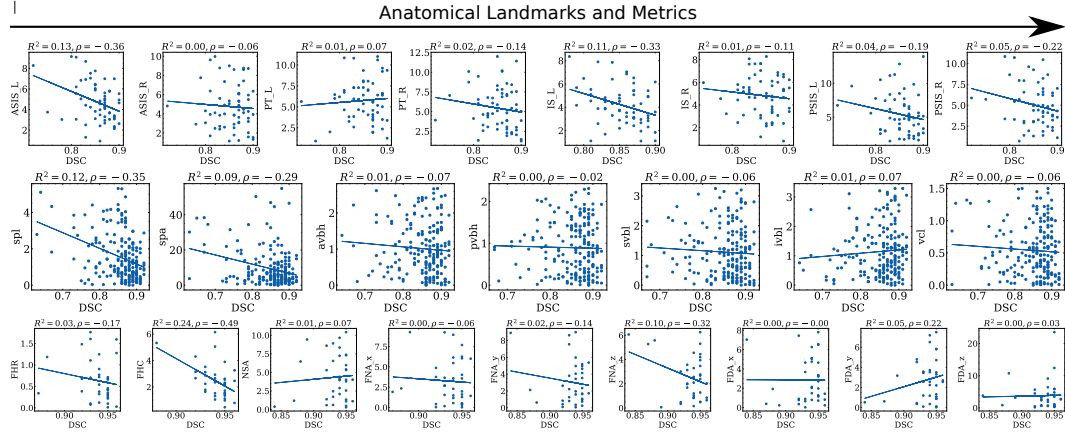

Figure 5: Relationship between Dice and Clinical Metrics across data samples on a single architecture(AttentionUnet): Top (Hip), Middle (Vertebra) and Bottom (femur)

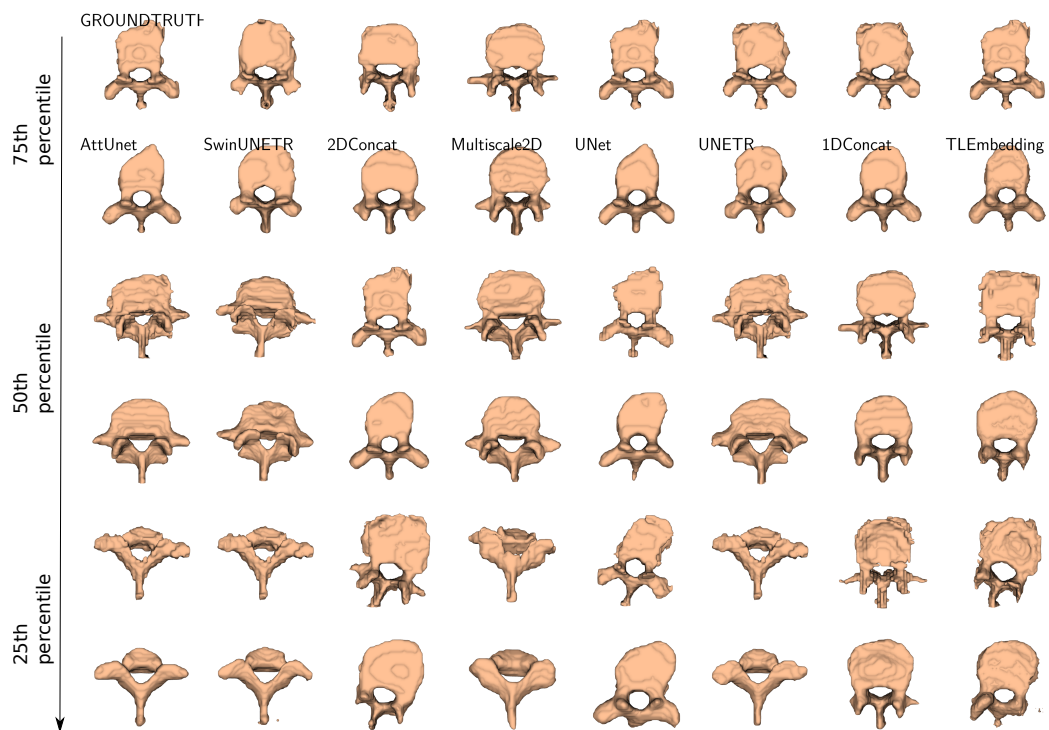

Figure 6: Vertebra Qualitative Results: 1st, 3rd and 5th row are groundtruth for corresponding architectures, whereas 2nd, 4th and 6th row are model predictions. The vertical axis represents the best(75th percentile), median and worse(25th percentile) samples for each architectures.

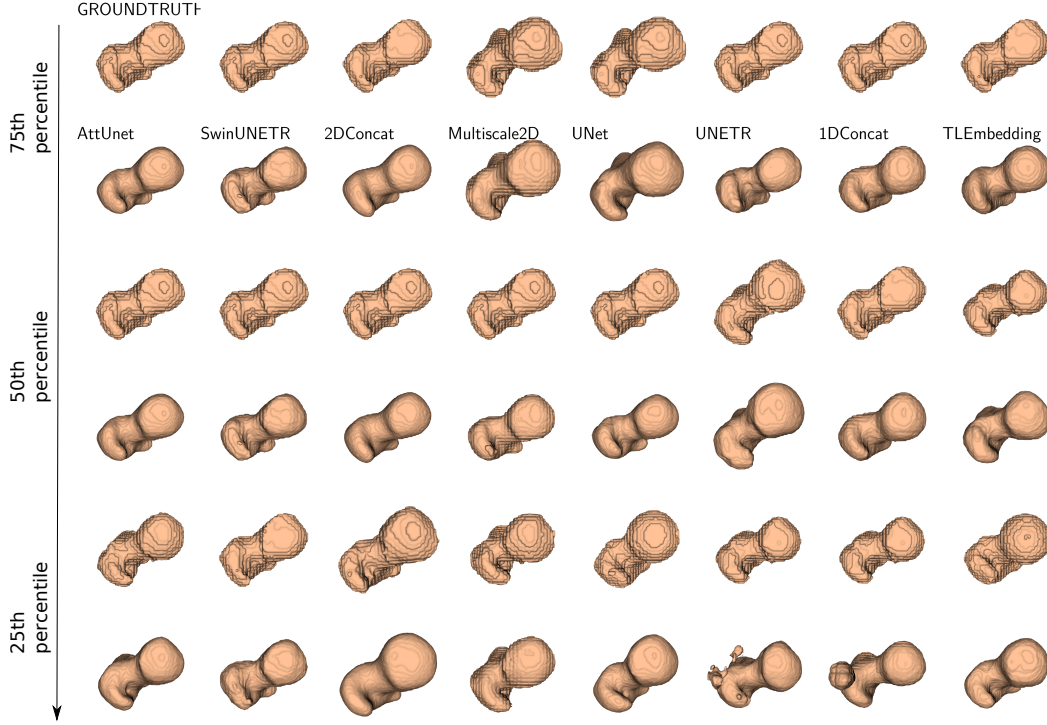

Figure 7: Femur Qualitative Results: 1st, 3rd and 5th row are groundtruth for corresponding architectures, whereas 2nd, 4th and 6th row are model predictions. The vertical axis represents the best(75th percentile), median and worse(25th percentile) samples for each architecture.

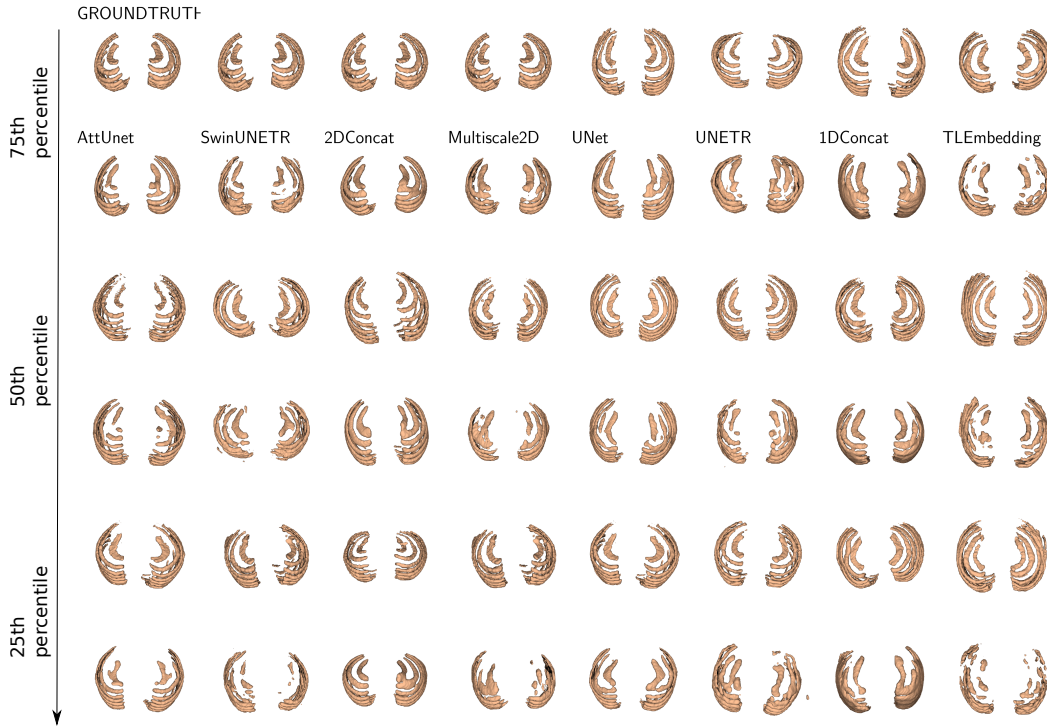

Figure 8: Rib Qualitative Results: 1st, 3rd and 5th row are groundtruth for corresponding architectures, whereas 2nd, 4th and 6th row are model predictions. The vertical axis represents the best(75th percentile), median and worse(25th percentile) samples for each architecture.

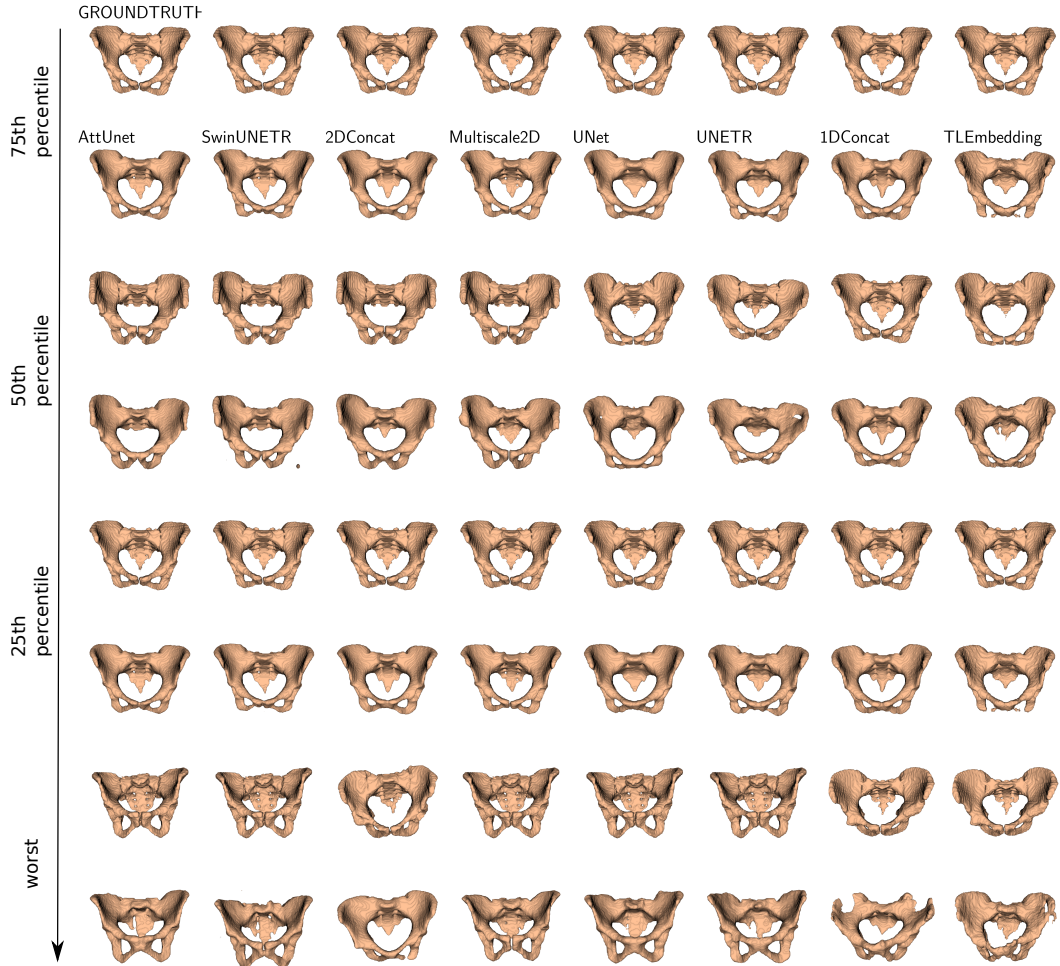

Figure 9: Hip Qualitative Results: 1st, 3rd and 5th row are groundtruth for corresponding architectures, whereas 2nd, 4th and 6th row are model predictions. The vertical axis represents the 75th percentile, median, 25th percentile and worse samples for each architecture.

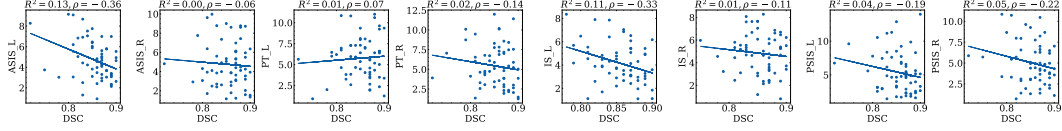

Figure 10: Hip/AttentionUnet

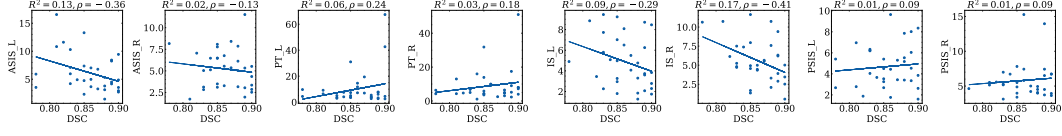

Figure 11: Hip/SwinUNETR

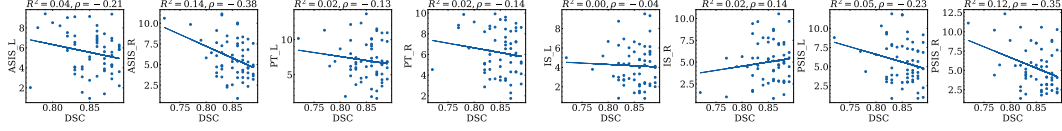

Figure 12: Hip/2DConcat

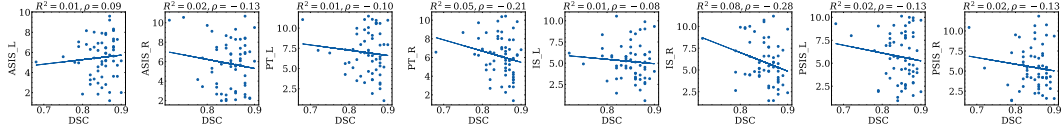

Figure 13: Hip/Multiscale2DConcat

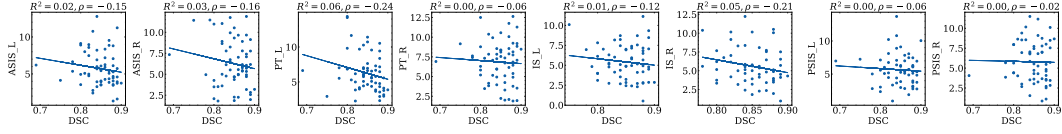

Figure 14: Hip/UNet

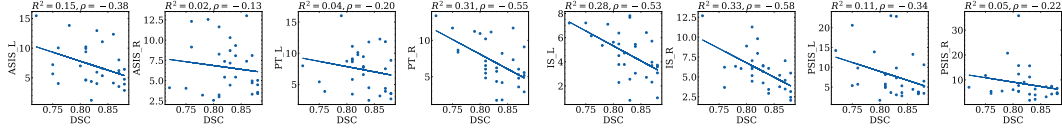

Figure 15: Hip/UNETR

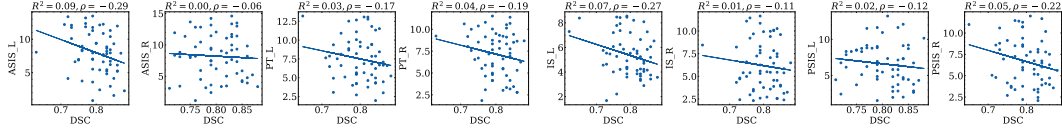

Figure 16: Hip/TLPredictor

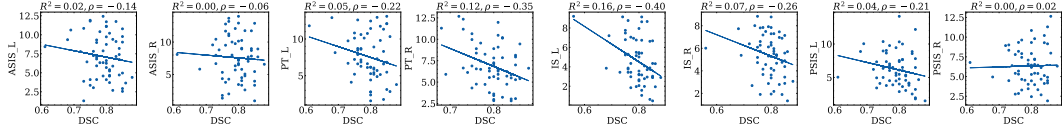

Figure 17: Hip/1DConcat

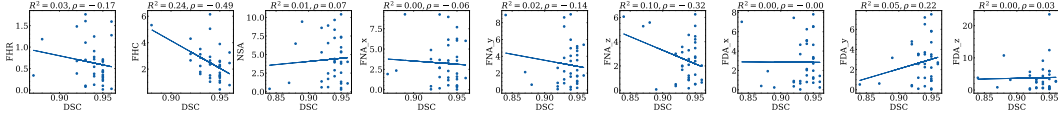

Figure 18: femur/AttentionUnet

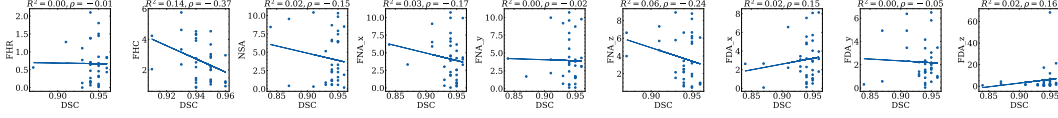

Figure 19: femur/SwinUNETR

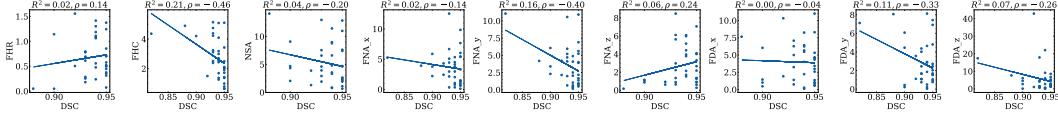

Figure 20: femur/2DConcat

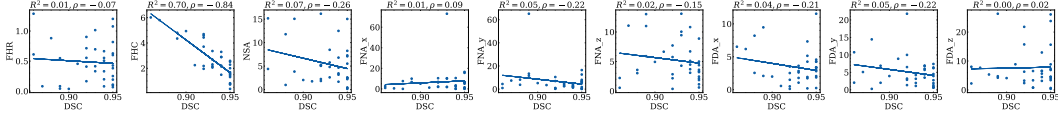

Figure 21: femur/Multiscale2DConcat

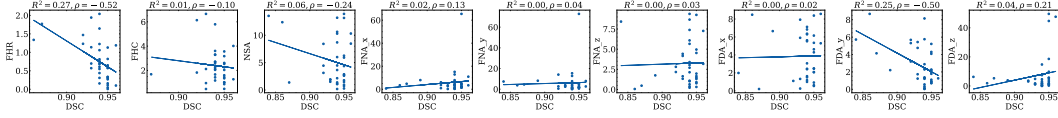

Figure 22: femur/UNet

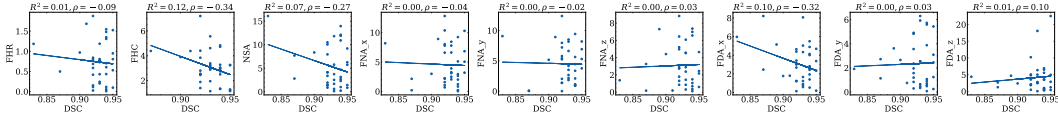

Figure 23: femur/UNETR

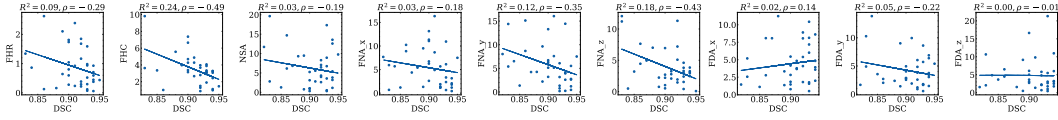

Figure 24: femur/TLPredictor

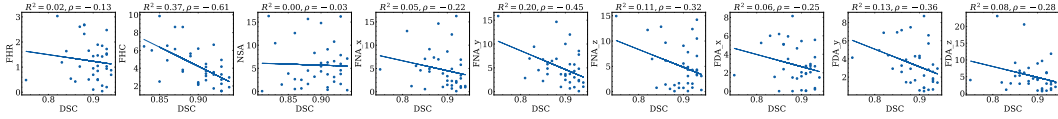

Figure 25: femur/1DConcat

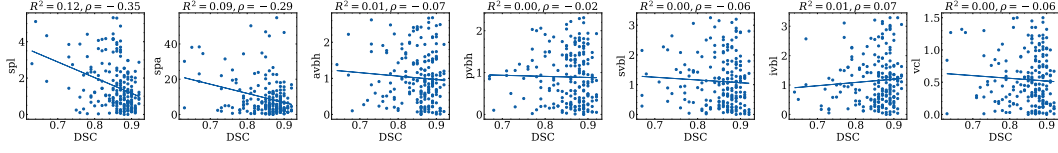

Figure 26: vertebra/AttentionUnet

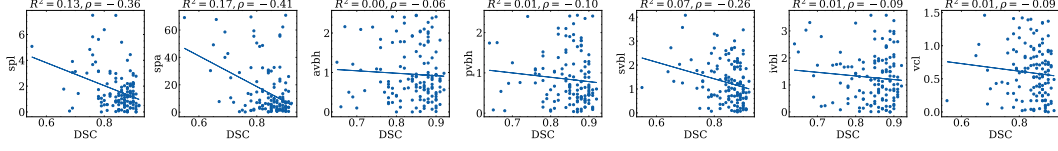

Figure 27: vertebra/SwinUNETR

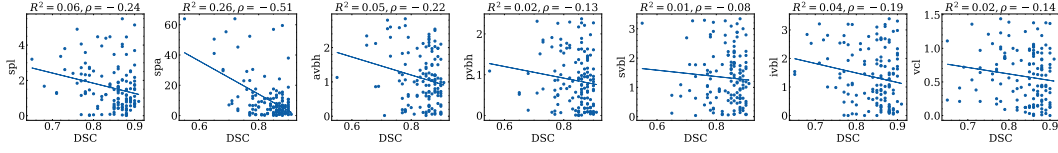

Figure 28: vertebra/2DConcat

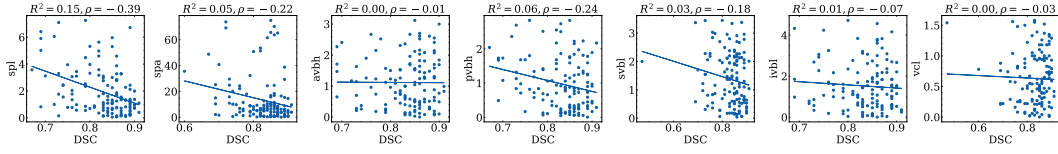

Figure 29: vertebra/Multiscale2DConcat

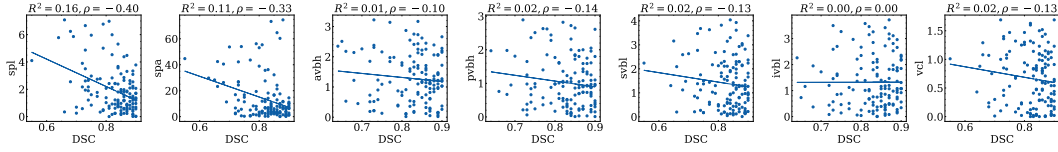

Figure 30: vertebra/UNet

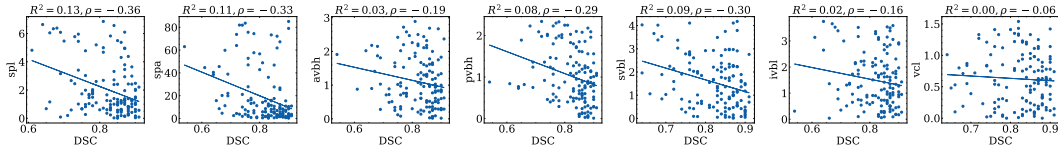

Figure 31: vertebra/UNETR

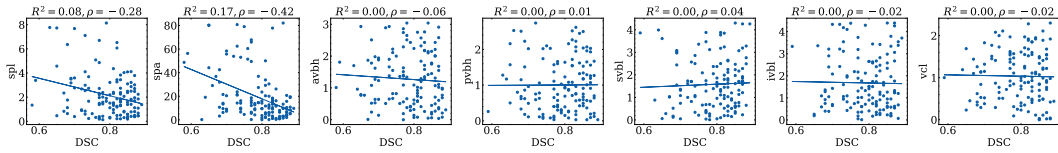

Figure 32: vertebra/TLPredictor

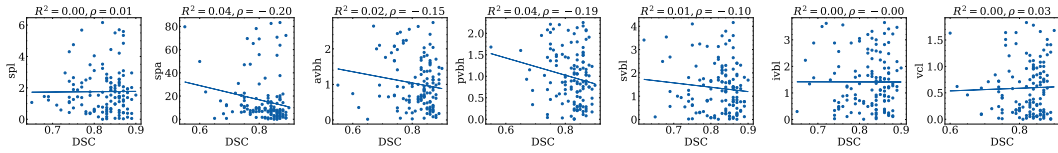

Figure 33: vertebra/1DConcat

## 48 Checklist

- 49 1. For all authors...
- 50 (a) Do the main claims made in the abstract and introduction accurately reflect the paper's  
51 contributions and scope? [Yes]
- 52 (b) Did you describe the limitations of your work? [Yes]
- 53 (c) Did you discuss any potential negative societal impacts of your work? [N/A]
- 54 (d) Have you read the ethics review guidelines and ensured that your paper conforms to  
55 them? [Yes]
- 56 2. If you are including theoretical results...
- 57 (a) Did you state the full set of assumptions of all theoretical results? [N/A]
- 58 (b) Did you include complete proofs of all theoretical results? [N/A]
- 59 3. If you ran experiments (e.g. for benchmarks)...
- 60 (a) Did you include the code, data, and instructions needed to reproduce the main experi-  
61 mental results (either in the supplemental material or as a URL)? [Yes] We will release  
62 the GitHub repositories containing benchmarking framework and bone morphometry  
63 extraction scripts.
- 64 (b) Did you specify all the training details (e.g., data splits, hyperparameters, how they were  
65 chosen)? [Yes] Details for hyperparameter tuning are attached in the supplementary  
66 section. Data splits are available in the GitHub repository.
- 67 (c) Did you report error bars (e.g., with respect to the random seed after running ex-  
68 periments multiple times)? [No] We perform hyperparameter tuning in preliminary  
69 experiments and perform the main experiments with one seed and one set of hyperpa-  
70 rameters because they are computationally expensive.
- 71 (d) Did you include the total amount of compute and the type of resources used (e.g.,  
72 type of GPUs, internal cluster, or cloud provider)? [Yes] We used a single NVIDIA  
73 RTX3090 and NVIDIA 1080Ti GPU to train models. 50 hyperparameter tuning runs  
74 each running 1 hour on average were performed. Full Training runs lasted from 1-2  
75 hours.
- 76 4. If you are using existing assets (e.g., code, data, models) or curating/releasing new assets...
- 77 (a) If your work uses existing assets, did you cite the creators? [Yes]
- 78 (b) Did you mention the license of the assets? [Yes] Verse2019: CC BY-SA 4.0 License,  
79 TotalSegmentator: Apache-2.0 license, CTPelvic1k: no explicit licence mentioned, but  
80 made publicly available
- 81 (c) Did you include any new assets either in the supplemental material or as a URL? [Yes]  
82 The filtered subject-id used from the original dataset and additional segmentation used  
83 for bone morphometry will be provided in the GitHub repository.
- 84 (d) Did you discuss whether and how consent was obtained from people whose data you're  
85 using/curating? [N/A] All datasets we used were publicly available and hence explicit  
86 consent was not required.
- 87 (e) Did you discuss whether the data you are using/curating contains personally identifiable  
88 information or offensive content? [N/A] None of the Datasets we use contain personally  
89 identifiable information or offensive content.
- 90 5. If you used crowdsourcing or conducted research with human subjects...
- 91 (a) Did you include the full text of instructions given to participants and screenshots, if  
92 applicable? [N/A]
- 93 (b) Did you describe any potential participant risks, with links to Institutional Review  
94 Board (IRB) approvals, if applicable? [N/A]
- 95 (c) Did you include the estimated hourly wage paid to participants and the total amount  
96 spent on participant compensation? [N/A]
